# Supplementary material for: Effects of a novel mobile health intervention compared to a multi-component behaviour changing program on body mass index, physical capacities and stress parameters in adolescents with obesity: a randomized controlled trial
Source: Springer Nature journal article supplement (doi:10.1186/s12887-021-02781-2), 2021-07-09
Supplement: MOESM2 [file 19348554]

**Additional file 2** – Median values for BMI-SDS at each point time and change to intervention start (D1, D2).

|         |     |                                          | <b>T0</b>         | <b>T1</b>         | <b>T2</b>         | <b>D1 (change T1–T0)</b> | <b>D2 (change T2–T0)</b> |
|---------|-----|------------------------------------------|-------------------|-------------------|-------------------|--------------------------|--------------------------|
| BMI-SDS | PM  | median (range)                           | 2.62 (1.7 to 3.5) | 2.68 (1.6 to 3.3) | 2.71 (1.4 to 3.1) | -0.08 (-0.4 to 0.3)      | -0.09 (-0.4 to 0.4)      |
|         |     | n                                        | 18                | 18                | 17                | 18                       | 17                       |
|         | CON | median (range)                           | 2.55 (1.7 to 3.2) | 2.16 (0.2 to 3.3) | 2.28 (0.2 to 3.4) | -0.35* (-1.6 to 0.1)     | -0.16 (-1.9 to 0.3)      |
|         |     | n                                        | 13                | 13                | 11                | 13                       | 11                       |
|         |     | p-value <sup>a</sup> (group differences) | 0.65              | 0.12              | 0.48              | 0.02                     | 0.43                     |

\* p-values <0.05

<sup>a</sup> p-values testing the significance of group differences at each time point, and of group differences in change. Null hypothesis: medians of both groups are equal.

BMI-SDS: body mass index standard deviation score, PM: PathMate group, CON: Control group, T0: intervention start, T1 and T2: 5.5 and 12 months after intervention start, respectively
