# Supplementary material for: Effects of a novel mobile health intervention compared to a multi-component behaviour changing program on body mass index, physical capacities and stress parameters in adolescents with obesity: a randomized controlled trial
Source: Springer Nature journal article supplement (doi:10.1186/s12887-021-02781-2), 2021-07-09
Supplement: MOESM3 [file 19348554]

**Additional file 3 – Median values of body composition at each point time and change to intervention start (D1, D2).**

|                                 |     |                                          | <b>T0</b>            | <b>T1</b>            | <b>T2</b>            | <b>D1 (change T1–T0)</b> | <b>D2 (change T2–T0)</b> |
|---------------------------------|-----|------------------------------------------|----------------------|----------------------|----------------------|--------------------------|--------------------------|
| <b>Waist circumference (cm)</b> | PM  | median (range)                           | 95.0 (76 to 109)     | 95.5 (72 to 108)     | 94.8 (77 to 107)     | -0.1 (-10 to 4)          | 2.5 (-12 to 6)           |
|                                 |     | n                                        | 15                   | 17                   | 16                   | 14                       | 14                       |
|                                 | CON | median (range)                           | 89.0 (74 to 114)     | 87.0 (70 to 108)     | 86.0 (67 to 113)     | -5.5 (-10 to 8)          | -3.5 (-14 to 10)         |
|                                 |     | n                                        | 12                   | 11                   | 11                   | 11                       | 10                       |
|                                 |     | p-value <sup>a</sup> (group differences) | 0.464                | 0.115                | 0.093                | 0.17                     | 0.079                    |
| <b>Waist-to-height ratio</b>    | PM  | median (range)                           | 0.578 (0.46 to 0.68) | 0.565 (0.45 to 0.62) | 0.563 (0.47 to 0.62) | -0.008 (-0.08 to 0.02)   | -0.001 (-0.10 to 0.04)   |
|                                 |     | n                                        | 15                   | 17                   | 16                   | 14                       | 14                       |
|                                 | CON | median (range)                           | 0.538 (0.47 to 0.64) | 0.506 (0.43 to 0.60) | 0.510 (0.40 to 0.61) | -0.040* (-0.05 to 0.05)  | -0.034 (-0.11 to 0.05)   |
|                                 |     | n                                        | 12                   | 11                   | 11                   | 11                       | 10                       |
|                                 |     | p-value <sup>a</sup> (group differences) | 0.399                | 0.059                | 0.121                | 0.183                    | 0.064                    |
| <b>Muscle mass (kg)</b>         | PM  | median (range)                           | 26.2 (20 to 35)      | 28.2 (21 to 36)      | 30.0 (22 to 44)      | 2.1** (0 to 6)           | 5.4** (1 to 13)          |
|                                 |     | n                                        | 18                   | 18                   | 13                   | 18                       | 13                       |
|                                 | CON | median (range)                           | 24.6 (20 to 47)      | 26.4 (20 to 50)      | 27.0 (21 to 50)      | 0.6 (-5 to 5)            | 3.0** (1 to 7)           |
|                                 |     | n                                        | 13                   | 12                   | 9                    | 12                       | 9                        |
|                                 |     | p-value <sup>a</sup> (group differences) | 0.984                | 0.626                | 0.242                | 0.034                    | 0.442                    |

|                       |     |                                          |                 |                 |                 |                  |                 |
|-----------------------|-----|------------------------------------------|-----------------|-----------------|-----------------|------------------|-----------------|
| <b>Fat percentage</b> | PM  | median (range)                           | 37.4 (31 to 48) | 37.9 (26 to 44) | 35.6 (24 to 48) | -2.5* (-8 to 3)  | -3.7* (-9 to 4) |
|                       |     | n                                        | 18              | 18              | 13              | 18               | 13              |
|                       | CON | median (range)                           | 36.7 (30 to 44) | 32.3 (15 to 51) | 29.5 (10 to 48) | -3.3 (-15 to 10) | -8.3 (-20 to 7) |
|                       |     | n                                        | 13              | 12              | 9               | 12               | 9               |
|                       |     | p-value <sup>a</sup> (group differences) | 0.32            | 0.24            | 0.23            | 0.51             | 0.43            |

\* p-values <0.05, \*\* p-values <0.001

<sup>a</sup> p-values testing the significance of group differences at each time point, and of group differences in change. Null hypothesis: medians of both groups are equal.

PM: PathMate group, CON: Control group, T0: intervention start, T1 and T2: 5.5 and 12 months after intervention start, respectively
