# Supplementary material for: Effects of a novel mobile health intervention compared to a multi-component behaviour changing program on body mass index, physical capacities and stress parameters in adolescents with obesity: a randomized controlled trial
Source: Springer Nature journal article supplement (doi:10.1186/s12887-021-02781-2), 2021-07-09
Supplement: MOESM4 [file 19348554]

**Additional file 4 – Median values of fitness tests at each point time and change to intervention start (D1, D2).**

|                                           |     |                                             | <b>T0</b>            | <b>T1</b>            | <b>T2</b>            | <b>D1 (T1–<br/>baseline)</b> | <b>D2 (T2–<br/>baseline)</b> |
|-------------------------------------------|-----|---------------------------------------------|----------------------|----------------------|----------------------|------------------------------|------------------------------|
| <b>Side jumps<br/>(n/30 sec)</b>          | PM  | median<br>(range)                           | 71.5<br>(51 to 84)   | 81.5<br>(63 to 99)   | 84.0<br>(64 to 101)  | 12.0**<br>(2 to 27)          | 14.0*<br>(2 to 24)           |
|                                           | CON | median<br>(range)                           | 69.0<br>(62 to 82)   | 80.0<br>(67 to 103)  | 79.0<br>(70 to 114)  | 9.0*<br>(4 to 23)            | 11.0*<br>(3 to 32)           |
|                                           |     | p-value <sup>a</sup><br>(group differences) | 0.79                 | 0.58                 | 0.61                 | 0.4                          | 0.41                         |
| <b>Tap Test<br/>(sec/25<br/>cycles)</b>   | PM  | median<br>(range)                           | 12.4<br>(10 to 21)   | 10.6<br>(8 to 17)    | 10.9<br>(7 to 16)    | -1.6**<br>(-3 to 1)          | -2.7*<br>(-5 to -0)          |
|                                           | CON | median<br>(range)                           | 11.7<br>(10 to 16)   | 11.3<br>(9 to 14)    | 10.8<br>(8 to 15)    | -1.4*<br>(-3 to 1)           | -1.3*<br>(-2 to 0)           |
|                                           |     | p-value <sup>a</sup><br>(group differences) | 0.49                 | 0.88                 | 0.93                 | 0.24                         | 0.055                        |
| <b>6-minute-<br/>run (km)</b>             | PM  | median<br>(range)                           | 0.75<br>(0.5 to 1.0) | 0.79<br>(0.6 to 0.9) | 0.81<br>(0.6 to 0.9) | 0.03<br>(-0.1 to 0.2)        | 0.05<br>(-0.1 to 0.2)        |
|                                           | CON | median<br>(range)                           | 0.79<br>(0.7 to 0.9) | 0.83<br>(0.7 to 1.1) | 0.83<br>(0.7 to 1.1) | 0.05*<br>(-0.0 to 0.3)       | 0.12<br>(-0.1 to 0.2)        |
|                                           |     | p-value <sup>a</sup><br>(group differences) | 0.2                  | 0.14                 | 0.21                 | 0.4                          | 0.28                         |
| <b>Balance<br/>(failures<br/>per min)</b> | PM  | median<br>(range)                           | 2.0<br>(0 to 10)     | 0.0<br>(0 to 10)     | 0.0<br>(0 to 7)      | 0.0<br>(-4 to 7)             | 0.0<br>(-4 to 2)             |
|                                           | CON | median<br>(range)                           | 0.0<br>(0 to 3)      | 0.0<br>(0 to 2)      | 0.0<br>(0 to 1)      | 0.0<br>(-3 to 2)             | 0.0<br>(0 to 0)              |
|                                           |     | p-value <sup>a</sup><br>(group differences) | 0.13                 | 0.15                 | 0.89                 | 0.98                         | 0.19                         |

|                                         |     |                                          |                    |                    |                    |                   |                  |
|-----------------------------------------|-----|------------------------------------------|--------------------|--------------------|--------------------|-------------------|------------------|
| <b>Jump distance (cm)</b>               | PM  | median (range)                           | 121.0 (100 to 171) | 131.0 (97 to 189)  | 137.0 (103 to 182) | 7.5* (-20 to 25)  | 11.0 (-21 to 29) |
|                                         | CON | median (range)                           | 127.0 (106 to 172) | 142.0 (108 to 177) | 145.0 (100 to 196) | 10.5* (-19 to 35) | 18.0 (-27 to 56) |
|                                         |     | p-value <sup>a</sup> (group differences) | 0.35               | 0.24               | 0.11               | 0.67              | 0.12             |
| <b>Sit-ups (n/40 s)</b>                 | PM  | median (range)                           | 18.0 (2 to 26)     | 20.5 (3 to 28)     | 20.0 (12 to 30)    | 1.0* (-7 to 8)    | 4.5* (-1 to 11)  |
|                                         | CON | median (range)                           | 19.0 (5 to 27)     | 23.5 (16 to 28)    | 23.0 (18 to 28)    | 2.5* (-1 to 11)   | 3.0* (-2 to 13)  |
|                                         |     | p-value <sup>a</sup> (group differences) | 0.6                | 0.33               | 0.3                | 0.37              | 1                |
| <b>Push-ups (n/ 40 s)</b>               | PM  | median (range)                           | 8.5 (0 to 13)      | 9.5 (0 to 18)      | 10.5 (0 to 18)     | 1.5* (0 to 9)     | 3.0* (0 to 10)   |
|                                         | CON | median (range)                           | 8.0 (4 to 17)      | 11.5 (6 to 18)     | 13.0 (10 to 19)    | 3.0* (0 to 6)     | 4.0* (1 to 7)    |
|                                         |     | p-value <sup>a</sup> (group differences) | 0.42               | 0.35               | 0.2                | 0.8               | 0.57             |
| <b>Sit and reach – Flexibility (cm)</b> | PM  | median (range)                           | -3.5 (-16 to 9)    | 0.5 (-14 to 13)    | -2.0 (-18 to 15)   | 4.0** (-1 to 12)  | 2.5 (-4 to 11)   |
|                                         | CON | median (range)                           | 1.0 (-15 to 14)    | 0.0 (-16 to 13)    | -3.0 (-16 to 13)   | 2.5 (-3 to 4)     | 0.0 (-3 to 7)    |
|                                         |     | p-value <sup>a</sup> (group differences) | 0.42               | 0.9                | 1                  | 0.035             | 0.51             |
| Number of patients (all tests)          | PM  | n                                        | 18                 | 18                 | 14                 | 18                | 14               |
|                                         | CON | n                                        | 13                 | 12                 | 9                  | 12                | 9                |

\* p-values  $\leq 0.05$ , \*\* p-values  $< 0.001$

<sup>a</sup> p-values testing the significance of group differences at each time point, and of group differences in change. Null hypothesis: medians of both groups are equal.

PM: PathMate group, CON: Control group, T0: intervention start, T1 and T2: 5.5 and 12 months after intervention start, respectively
