# Supplementary material for: Effects of a novel mobile health intervention compared to a multi-component behaviour changing program on body mass index, physical capacities and stress parameters in adolescents with obesity: a randomized controlled trial
Source: Springer Nature journal article supplement (doi:10.1186/s12887-021-02781-2), 2021-07-09
Supplement: MOESM5 [file 19348554]

**Additional file 5 – Median values of blood pressure and pulse at each point time and change to intervention start (D1, D2).**

|                                                    |     |                                                | <b>T0</b>             | <b>T1</b>             | <b>T2</b>             | <b>D1<br/>(change<br/>T1–T0)</b> | <b>D2<br/>(change<br/>T2–T0)</b> |
|----------------------------------------------------|-----|------------------------------------------------|-----------------------|-----------------------|-----------------------|----------------------------------|----------------------------------|
| <b>Systolic<br/>blood<br/>pressure<br/>(mmHg)</b>  | PM  | median<br>(range)                              | 120.0<br>(107 to 140) | 123.0<br>(93 to 136)  | 122.5<br>(103 to 136) | -3.0<br>(-27 to 18)              | 3.0<br>(-17 to 20)               |
|                                                    |     | n                                              | 17                    | 18                    | 16                    | 17                               | 15                               |
|                                                    | CON | median<br>(range)                              | 128.0<br>(112 to 140) | 117.0<br>(108 to 136) | 118.0<br>(105 to 130) | -5.0*<br>(-24 to 8)              | -4.5<br>(-20 to 7)               |
|                                                    |     | n                                              | 13                    | 13                    | 10                    | 13                               | 10                               |
|                                                    |     | p-value <sup>a</sup><br>(group<br>differences) | 0.32                  | 0.67                  | 0.25                  | 0.41                             | 0.11                             |
| <b>Diastolic<br/>blood<br/>pressure<br/>(mmHg)</b> | PM  | median<br>(range)                              | 62.0<br>(53 to 77)    | 59.5<br>(57 to 77)    | 70.0<br>(57 to 85)    | -3.0<br>(-12 to 20)              | 7.0<br>(-8 to 28)                |
|                                                    |     | n                                              | 17                    | 18                    | 16                    | 17                               | 15                               |
|                                                    | CON | median<br>(range)                              | 67.0<br>(53 to 82)    | 65.0<br>(54 to 78)    | 65.5<br>(53 to 85)    | -1.0<br>(-17 to 11)              | 0.5<br>(-10 to 9)                |
|                                                    |     | n                                              | 13                    | 13                    | 10                    | 13                               | 10                               |
|                                                    |     | p-value <sup>a</sup><br>(group<br>differences) | 0.19                  | 0.42                  | 0.63                  | 0.95                             | 0.16                             |
| <b>Pulse<br/>(per min)</b>                         | PM  | median<br>(range)                              | 82.0<br>(62 to 108)   | 90.5<br>(59 to 121)   | 89.5<br>(61 to 120)   | 4.0<br>(-14 to 26)               | 0.0<br>(-23 to 40)               |
|                                                    |     | n                                              | 17                    | 18                    | 16                    | 17                               | 15                               |
|                                                    | CON | median<br>(range)                              | 82.5<br>(56 to 124)   | 77.0<br>(55 to 92)    | 65.0<br>(51 to 104)   | -1.0<br>(-34 to 11)              | -7.0<br>(-38 to 33)              |
|                                                    |     | n                                              | 12                    | 12                    | 10                    | 11                               | 9                                |
|                                                    |     | p-value <sup>a</sup><br>(group<br>differences) | 0.63                  | 0.042                 | 0.029                 | 0.07                             | 0.12                             |

\* p-values <0.05, \*\* p-values <0.001

<sup>a</sup> p-values testing the significance of group differences at each time point, and of group differences in change (null hypothesis: medians of both groups are equal)

PM: PathMate group, CON: Control group, T0: intervention start, T1 and T2: 5.5 and 12 months after intervention start, respectively
