# Supplementary material for: Effects of a novel mobile health intervention compared to a multi-component behaviour changing program on body mass index, physical capacities and stress parameters in adolescents with obesity: a randomized controlled trial
Source: Springer Nature journal article supplement (doi:10.1186/s12887-021-02781-2), 2021-07-09
Supplement: MOESM6 [file 19348554]

**Additional file 6 – Median values of TICS and cortisol at each time point and change to baseline (D1, D2).**

|                                                         |     |                   | <b>BI</b>                                      | <b>T1</b>              | <b>T2</b>               | <b>D1<br/>(change T1–BI)</b> | <b>D2<br/>(change T2–BI)</b> |
|---------------------------------------------------------|-----|-------------------|------------------------------------------------|------------------------|-------------------------|------------------------------|------------------------------|
| <b>TICS score<br/>(T-values,<br/>range 15-<br/>99)</b>  | PM  | median<br>(range) | 50.0<br>(37 to 59)                             | 49.0<br>(35 to 66)     | 54.0<br>(37 to 65)      | -2.0<br>(-11 to 16)          | 1.0<br>(-14 to 7)            |
|                                                         |     | n                 | 15                                             | 15                     | 12                      | 13                           | 9                            |
|                                                         | CON | median<br>(range) | 58.5<br>(35 to 66)                             | 56.0<br>(15 to 66)     | 53.0<br>(41 to 69)      | -2.0<br>(-21 to 8)           | 3.5<br>(-25 to 6)            |
|                                                         |     | n                 | 12                                             | 11                     | 8                       | 11                           | 8                            |
|                                                         |     |                   | p-value <sup>a</sup><br>(group<br>differences) | 0.14                   | 0.35                    | 0.59                         | 0.6                          |
| <b>Cortisol<br/>before<br/>relaxation<br/>in nmol/L</b> | PM  | median<br>(range) | 220.0<br>(109 to 1307)                         | 214.5<br>(98 to 402)   | 357.0<br>(122 to 576)   | -11.0<br>(-1140 to 177)      | 85.5<br>(-1146 to 328)       |
|                                                         |     | n                 | 17                                             | 18                     | 15                      | 17                           | 14                           |
|                                                         | CON | median<br>(range) | 219.5<br>(124 to 434)                          | 239.0<br>(67 to 420)   | 312.0<br>(150 to 491)   | -51.5<br>(-170 to 251)       | 78.0*<br>(-19 to 311)        |
|                                                         |     | n                 | 12                                             | 13                     | 9                       | 12                           | 8                            |
|                                                         |     |                   | p-value <sup>a</sup><br>(group<br>differences) | 1                      | 0.92                    | 0.95                         | 0.45                         |
| <b>Cortisol<br/>after<br/>relaxation<br/>(% change)</b> | PM  | median<br>(range) | -33.9#<br>(-72 to 140)                         | -34.2##<br>(-63 to 18) | -43.6<br>(-55 to 58)    | 0.9<br>(-172 to 67)          | 8.4<br>(-187 to 97)          |
|                                                         |     | n                 | 17                                             | 16                     | 13                      | 15                           | 12                           |
|                                                         | CON | median<br>(range) | -35.6##<br>(-78 to -10)                        | -39.2##<br>(-80 to 23) | -56.4##<br>(-72 to -11) | -7.6<br>(-39 to 70)          | -12.5<br>(-62 to 66)         |
|                                                         |     | n                 | 11                                             | 10                     | 9                       | 8                            | 7                            |
|                                                         |     |                   | p-value <sup>a</sup>                           | 1                      | 0.979                   | 0.144                        | 0.825                        |

\* p-values <0.05: Testing whether change from T0 to T1 or T2 within groups differs from 0.

# p-values <0.05, ## p-values <0.001: Testing whether percentage of cortisol change after relaxation within groups at each point time differs from 0.

<sup>a</sup> p-values testing the significance of group differences at each time point, and of group differences in change. Null hypothesis: medians of both groups are equal.

BI: baseline, on average 5 weeks before the start of intervention

PM: PathMate group, CON: Control group, T1 and T2: 5.5 and 12 months after intervention start, respectively

TICS: Trierer Stress Inventar questionnaire

Cortisol after relaxation (% change): percentage change of plasma cortisol after biofeedback relaxation exercise compared to cortisol before relaxation
