# Supplementary material for: Effects of a novel mobile health intervention compared to a multi-component behaviour changing program on body mass index, physical capacities and stress parameters in adolescents with obesity: a randomized controlled trial
Source: Springer Nature journal article supplement (doi:10.1186/s12887-021-02781-2), 2021-07-09
Supplement: MOESM7 [file 19348554]

## Additional file 7 – App usage analytics

**Table a.** Smartphone app and PathMate2 app usage during the intervention period, i.e. 162 days (N=11). Note: The duration was measured with the Android *App Usage Tracker* app by Vaibhav Agrawal.<sup>1</sup> Due to technical issues (e.g. the app background process was suspended by the Android operating system) or human involvement (e.g. the patients or parents stopped the app), data from 11 PM participants is reported.

| Statistic | Total smartphone app usage per day in minutes | PathMate2 app usage per day in minutes | Ratio of PathMate2 app usage and total smartphone app usage in percent |
|-----------|-----------------------------------------------|----------------------------------------|------------------------------------------------------------------------|
| Mean      | 16.2                                          | 0.8                                    | 16.0%                                                                  |
| Median    | 6.0                                           | 0.3                                    | 3.9%                                                                   |
| SD        | 26.8                                          | 1.5                                    | 0.2                                                                    |
| Min       | 0.3                                           | 0.0                                    | 0.6%                                                                   |
| Max       | 88.6                                          | 5.2                                    | 62.4%                                                                  |

**Table b.** Most-frequently used smartphone apps during the intervention period, i.e. 162 days (N=11). Note: App usage was measured with the Android *App Usage Tracker* app by Vaibhav Agrawal.<sup>1</sup> Due to technical issues (e.g. the app background process was suspended by the Android operating system) or human involvement (e.g. the patients or parents stopped the app), data from 11 PM participants is reported.

| Rank | App             | App Category     | N | Freq in % |
|------|-----------------|------------------|---|-----------|
| 1    | YouTube         | Social Media     | 5 | 45.5%     |
| 2    | PathMate2       | Health & Fitness | 3 | 27.3%     |
| 3    | WhatsApp        | Social Media     | 1 | 9.1%      |
| 3    | SnapChat        | Social Media     | 1 | 9.1%      |
| 3    | Big Fish Casino | Mobile Game      | 1 | 9.1%      |

app: application, PM: PathMate group, SD: standard deviation

<sup>1</sup> <https://play.google.com/store/apps/details?id=com.agrvaibhav.AppUsageTracking&hl=en>
