# Supplementary material for: Effects of a novel mobile health intervention compared to a multi-component behaviour changing program on body mass index, physical capacities and stress parameters in adolescents with obesity: a randomized controlled trial
Source: Springer Nature journal article supplement (doi:10.1186/s12887-021-02781-2), 2021-07-09
Supplement: MOESM9 [file 19348554]

## Correlation between delta BMI-SDS T0-T2 (x axis) & delta TICS T0-T2 (y axis)

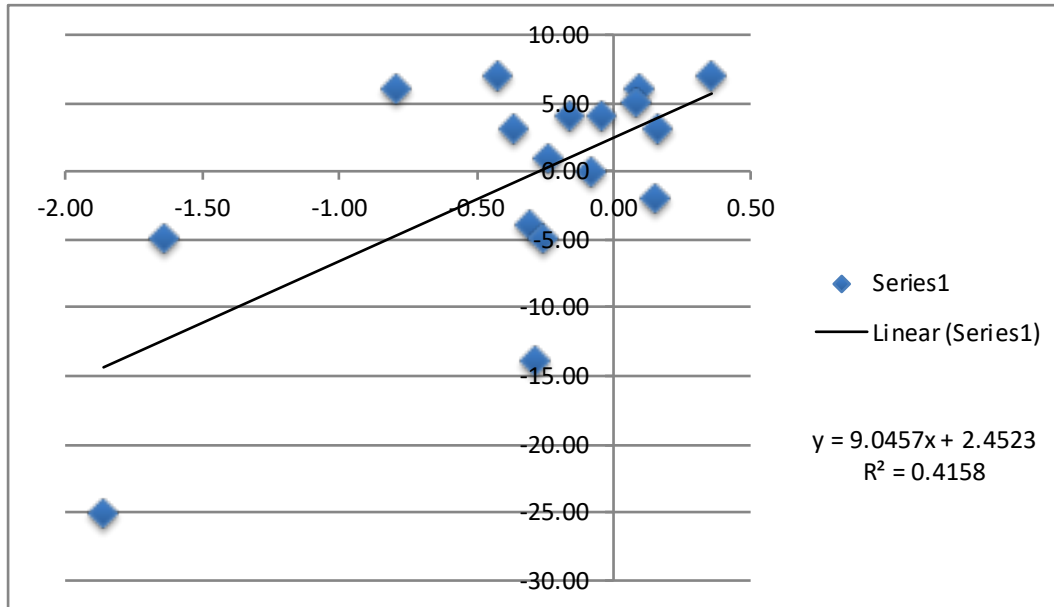

$r = 0.64$

$r^2 = 0.42$

$n = 16$

$t_c = 0.23$

$t = 3.27, p = 0.005$

Spearman's rho = 0.38,  $p = 0.13$

### Abbreviations

delta BMI-SDS T0-T2 BMI-SDS at T2 (12 months) minus BMI-SDS at T0 (start)

delta TICS T0-T2 TICS score at T2 (12 months) minus TICS score at T0 (start)

$r$  correlation coefficient

$n$  number of observations

$t_c$  t-test for the significance of correlation coefficient,  
 $t = r / \text{SQRT}((1 - r^2) / (n - 2))$

SQRT square root

Spearman's rho Spearman's rank correlation coefficient

BMI-SDS body mass index standard deviation score

TICS Trierer Stress Inventar questionnaire

## Correlation between delta TICS T0-T2 (x axis) & and delta WC T0-T2 (y axis)

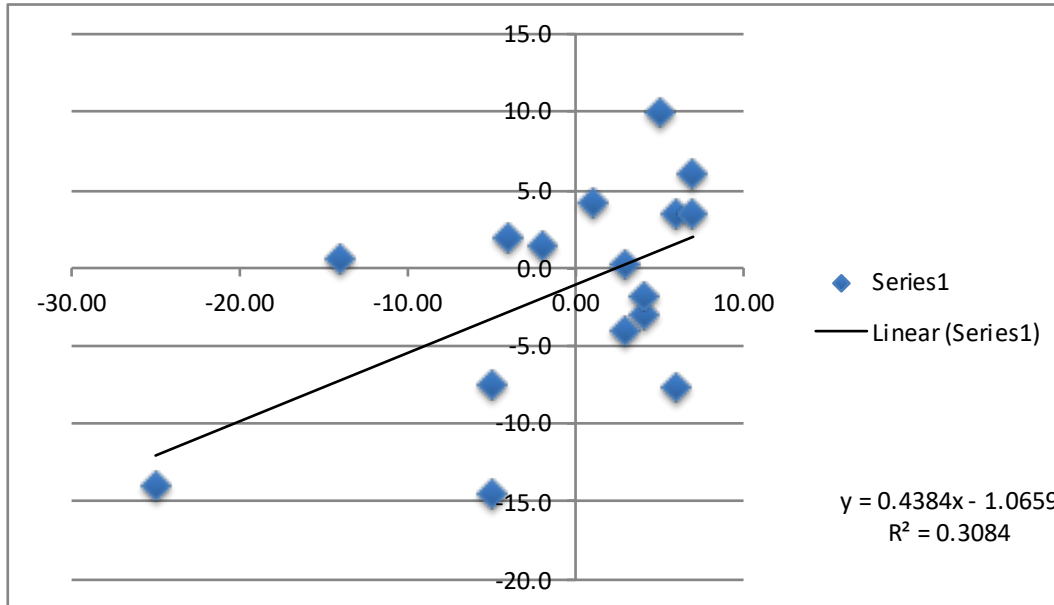

$r = 0.56$   
 $r^2 = 0.31$   
 $n = 16$   
 $t_c = 0.18$   
 $t = 2.50, p = 0.026$   
 Spearman's rho = 0.50,  $p = 0.049$

### Abbreviations

|                  |                                                                                             |
|------------------|---------------------------------------------------------------------------------------------|
| delta TICS T0-T2 | TICS score at T2 (12 months) minus TICS score at T0 (start)                                 |
| delta WC T0-T2   | Waist circumference at T2 (12 months) minus waist circumference at T0 (start)               |
| r                | correlation coefficient                                                                     |
| n                | number of observations                                                                      |
| t_c              | t-test for the significance of correlation coefficient,<br>$t=r/\text{SQRT}((1-r^2)/(n-2))$ |
| SQRT             | square root                                                                                 |
| Spearman's rho   | Spearman's rank correlation coefficient                                                     |
| TICS             | Trierer Stress Inventar questionnaire                                                       |
