# Supplementary material for: Effects of a novel mobile health intervention compared to a multi-component behaviour changing program on body mass index, physical capacities and stress parameters in adolescents with obesity: a randomized controlled trial
Source: Springer Nature journal article supplement (doi:10.1186/s12887-021-02781-2), 2021-07-09
Supplement: MOESM10 [file 19348554]

**Additional file 10** – Median values for BMI-SDS with last observation carried forward analysis at each point time and change to intervention start (D1, D2).

|                                                                |     |                                                | <b>T0</b>            | <b>T1</b>            | <b>T2</b>            | <b>D1 (change T1–T0)</b> | <b>D2 (change T2–T0)</b> |
|----------------------------------------------------------------|-----|------------------------------------------------|----------------------|----------------------|----------------------|--------------------------|--------------------------|
| BMI-SDS<br>Last<br>observation<br>carried<br>forward<br>(LOCF) | PM  | median<br>(range)                              | 2.62<br>(1.7 to 3.5) | 2.68<br>(1.6 to 3.3) | 2.72<br>(1.4 to 3.3) | -0.08<br>(-0.4 to 0.3)   | -0.12<br>(-0.4 to 0.4)   |
|                                                                |     | n                                              | 18                   | 18                   | 18                   | 18                       | 18                       |
|                                                                | CON | median<br>(range)                              | 2.55<br>(1.7 to 3.2) | 2.16<br>(0.2 to 3.3) | 2.23<br>(0.2 to 3.4) | -0.35*<br>(-1.6 to 0.1)  | -0.30<br>(-1.9 to 0.3)   |
|                                                                |     | n                                              | 13                   | 13                   | 13                   | 13                       | 13                       |
|                                                                |     | p-value <sup>a</sup><br>(group<br>differences) | 0.65                 | 0.125                | 0.193                | 0.02                     | 0.17                     |

\* p-values <0.05

<sup>a</sup> p-values testing the significance of group differences at each time point, and of group differences in change. Null hypothesis: medians of both groups are equal.

BMI-SDS: body mass index standard deviation score, PM: PathMate group, CON: Control group, T0: intervention start, T1 and T2: 5.5 and 12 months after intervention start, respectively
