# Supplementary material for: Effects of a novel mobile health intervention compared to a multi-component behaviour changing program on body mass index, physical capacities and stress parameters in adolescents with obesity: a randomized controlled trial
Source: Springer Nature journal article supplement (doi:10.1186/s12887-021-02781-2), 2021-07-09
Supplement: MOESM11 [file 19348554]

## **BMI-SDS** (body mass index standard deviation score)

### Test of effects based on a generalized estimating equations (GEE) model

| Effect          | X <sup>2</sup> | p-value |                         |
|-----------------|----------------|---------|-------------------------|
| Time            | 9.6            | 0.008   | 0 vs. 5.5 vs. 12 months |
| Treatment group | 2.0            | 0.160   |                         |
| Time * group    | 6.6            | 0.036   |                         |

### Estimation of effects based on this model

|                                                      | Coefficient | Wald test |
|------------------------------------------------------|-------------|-----------|
| Group difference in mean change from 0 to 5.5 months | 0.335       | p = 0.010 |
| Group difference in mean change from 0 to 12 months  | 0.362       | p = 0.096 |

Note: this effect is estimated on the original scale of measurement.

### Estimation of intragroup and inter-group effect sizes using Cohen's d

#### Intragroup effect sizes

| Group         | Change      | Cohen's d |
|---------------|-------------|-----------|
| PathMate (PM) | 0 to 5.5 mo | -0.336    |
| Control       | 0 to 5.5 mo | -0.842    |
| PathMate      | 0 to 12 mo  | -0.264    |
| Control       | 0 to 12 mo  | -0.539    |

These effects are estimated relative to their standard deviation i.e. scale-independent.

#### Intergroup effect sizes calculated as the difference between intragroup effect sizes

|                |                  |       |
|----------------|------------------|-------|
| PM vs. control | 0 to 5.5 mo (D1) | 0.506 |
| PM vs. control | 0 to 12 mo (D2)  | 0.275 |

#### Intergroup effect sizes calculated as Cohen's d for each time point

|                |                 |       |
|----------------|-----------------|-------|
| PM vs. control | 0 months (T0)   | 0.170 |
| PM vs. control | 5.5 months (T1) | 0.630 |
| PM vs. control | 12 months (T2)  | 0.512 |

Pooled standard deviation estimated from one-way analysis of variance.

## **Sidejump**

### Test of effects based on a generalized estimating equations (GEE) model

| Effect          | X <sup>2</sup> | p-value |                         |
|-----------------|----------------|---------|-------------------------|
| Time            | 131.4          | <0.001  | 0 vs. 5.5 vs. 12 months |
| Treatment group | 0.0            | 0.850   |                         |
| Time * group    | 0.4            | 0.810   |                         |

### Estimation of effects based on this model

|                                                      | Coefficient | Wald test |
|------------------------------------------------------|-------------|-----------|
| Group difference in mean change from 0 to 5.5 months | 1.47        | 0.519     |
| Group difference in mean change from 0 to 12 months  | 0.99        | 0.744     |

### Estimation of intragroup and inter-group effect sizes using Cohen's d

#### Intragroup effect sizes

| Group    | Change      | Cohen's d |
|----------|-------------|-----------|
| PathMate | 0 to 5.5 mo | 1.92      |

|          |             |      |
|----------|-------------|------|
| Control  | 0 to 5.5 mo | 1.73 |
| PathMate | 0 to 12 mo  | 2.29 |
| Control  | 0 to 12 mo  | 1.64 |

**Intergroup effect sizes calculated as the difference between intragroup effect sizes**

|                |                  |      |
|----------------|------------------|------|
| PM vs. control | 0 to 5.5 mo (D1) | 0.19 |
| PM vs. control | 0 to 12 mo (D2)  | 0.65 |

**Intergroup effect sizes calculated as Cohen's d for each time point**

|                |                 |       |
|----------------|-----------------|-------|
| PM vs. control | 0 months (T0)   | 0.170 |
| PM vs. control | 5.5 months (T1) | 0.630 |
| PM vs. control | 12 months (T2)  | 0.512 |

**Tap test (time)**

**Test of effects based on a generalized estimating equations (GEE) model**

| Effect          | X <sup>2</sup> | p-value |                         |
|-----------------|----------------|---------|-------------------------|
| Time            | 69.9           | <0.001  | 0 vs. 5.5 vs. 12 months |
| Treatment group | 0.1            | 0.813   |                         |
| Time * group    | 7.3            | 0.026   |                         |

**Estimation of effects based on this model**

|                                                      | Coefficient | Wald test |
|------------------------------------------------------|-------------|-----------|
| Group difference in mean change from 0 to 5.5 months | -0.52       | 0.178     |
| Group difference in mean change from 0 to 12 months  | -1.13       | 0.007     |

**Estimation of intragroup and inter-group effect sizes using Cohen's d**

**Intragroup effect sizes**

| Group    | Change      | Cohen's d |
|----------|-------------|-----------|
| PathMate | 0 to 5.5 mo | -1.413    |
| Control  | 0 to 5.5 mo | -1.023    |
| PathMate | 0 to 12 mo  | -1.742    |
| Control  | 0 to 12 mo  | -1.493    |

**Intergroup effect sizes calculated as the difference between intragroup effect sizes**

|                |                  |        |
|----------------|------------------|--------|
| PM vs. control | 0 to 5.5 mo (D1) | -0.39  |
| PM vs. control | 0 to 12 mo (D2)  | -0.249 |

**Intergroup effect sizes calculated as Cohen's d for each time point**

|                |                 |        |
|----------------|-----------------|--------|
| PM vs. control | 0 months (T0)   | 0.283  |
| PM vs. control | 5.5 months (T1) | 0.117  |
| PM vs. control | 12 months (T2)  | -0.104 |

**Run**

**Test of effects based on a generalized estimating equations (GEE) model**

| Effect          | X <sup>2</sup> | p-value |                         |
|-----------------|----------------|---------|-------------------------|
| Time            | 10.9           | 0.004   | 0 vs. 5.5 vs. 12 months |
| Treatment group | 3.6            | 0.059   |                         |
| Time * group    | 2.2            | 0.339   |                         |

| Estimation of effects based on this model            | Coefficient | Wald test |
|------------------------------------------------------|-------------|-----------|
| Group difference in mean change from 0 to 5.5 months | -0.047      | 0.168     |
| Group difference in mean change from 0 to 12 months  | -0.055      | 0.198     |

### Estimation of intragroup and inter-group effect sizes using Cohen's d

#### Intragroup effect sizes

| Group    | Change      | Cohen's d |
|----------|-------------|-----------|
| PathMate | 0 to 5.5 mo | 0.385     |
| Control  | 0 to 5.5 mo | 0.723     |
| PathMate | 0 to 12 mo  | 0.448     |
| Control  | 0 to 12 mo  | 0.65      |

#### Intergroup effect sizes calculated as the difference between intragroup effect sizes

|                |                  |        |
|----------------|------------------|--------|
| PM vs. control | 0 to 5.5 mo (D1) | -0.338 |
| PM vs. control | 0 to 12 mo (D2)  | -0.202 |

#### Intergroup effect sizes calculated as Cohen's d for each time point

|                |                 |        |
|----------------|-----------------|--------|
| PM vs. control | 0 months (T0)   | -0.362 |
| PM vs. control | 5.5 months (T1) | -0.767 |
| PM vs. control | 12 months (T2)  | -0.656 |

### One leg balance (failures, square-root transformed)

#### Test of effects based on a generalized estimating equations (GEE) model

| Effect          | X <sup>2</sup> | p-value |                         |
|-----------------|----------------|---------|-------------------------|
| Time            | 4.8            | 0.090   | 0 vs. 5.5 vs. 12 months |
| Treatment group | 3.1            | 0.078   |                         |
| Time * group    | 5              | 0.080   |                         |

| Estimation of effects based on this model            | Coefficient | Wald test |
|------------------------------------------------------|-------------|-----------|
| Group difference in mean change from 0 to 5.5 months | 0.022       | 0.948     |
| Group difference in mean change from 0 to 12 months  | -0.414      | 0.693     |

### Estimation of intragroup and inter-group effect sizes using Cohen's d

#### Intragroup effect sizes

| Group    | Change      | Cohen's d |
|----------|-------------|-----------|
| PathMate | 0 to 5.5 mo | -0.304    |
| Control  | 0 to 5.5 mo | -0.304    |
| PathMate | 0 to 12 mo  | -0.5      |
| Control  | 0 to 12 mo  |           |

Note: Given the data distribution (many zeroes), this analysis is not meaningful.

Calculation not possible because the standard deviation is 0.

#### Intergroup effect sizes calculated as the difference between intragroup effect sizes

|                |                  |   |
|----------------|------------------|---|
| PM vs. control | 0 to 5.5 mo (D1) | 0 |
| PM vs. control | 0 to 12 mo (D2)  |   |

#### Intergroup effect sizes calculated as Cohen's d for each time point

|                |                 |       |
|----------------|-----------------|-------|
| PM vs. control | 0 months (T0)   | 0.575 |
| PM vs. control | 5.5 months (T1) | 0.629 |
| PM vs. control | 12 months (T2)  | 0.204 |

## Jump distance

### Test of effects based on a generalized estimating equations (GEE) model

| Effect          | X <sup>2</sup> | p-value |                         |
|-----------------|----------------|---------|-------------------------|
| Time            | 15.4           | 0.005   | 0 vs. 5.5 vs. 12 months |
| Treatment group | 1.9            | 0.167   |                         |
| Time * group    | 2.4            | 0.301   |                         |

### Estimation of effects based on this model

|                                                      | Coefficient | Wald test |
|------------------------------------------------------|-------------|-----------|
| Group difference in mean change from 0 to 5.5 months | -2.826      | 0.563     |
| Group difference in mean change from 0 to 12 months  | -9.391      | 0.194     |

### Estimation of intragroup and inter-group effect sizes using Cohen's d

#### Intragroup effect sizes

| Group    | Change      | Cohen's d |
|----------|-------------|-----------|
| PathMate | 0 to 5.5 mo | 0.656     |
| Control  | 0 to 5.5 mo | 0.691     |
| PathMate | 0 to 12 mo  | 0.622     |
| Control  | 0 to 12 mo  | 0.84      |

#### Intergroup effect sizes calculated as the difference between intragroup effect sizes

|                |                  |        |
|----------------|------------------|--------|
| PM vs. control | 0 to 5.5 mo (D1) | -0.035 |
| PM vs. control | 0 to 12 mo (D2)  | -0.218 |

#### Intergroup effect sizes calculated as Cohen's d for each time point

|                |                 |        |
|----------------|-----------------|--------|
| PM vs. control | 0 months (T0)   | -0.385 |
| PM vs. control | 5.5 months (T1) | -0.503 |
| PM vs. control | 12 months (T2)  | -0.727 |

## Situps

### Test of effects based on a generalized estimating equations (GEE) model

| Effect          | X <sup>2</sup> | p-value |                         |
|-----------------|----------------|---------|-------------------------|
| Time            | 28.2           | <0.001  | 0 vs. 5.5 vs. 12 months |
| Treatment group | 0.5            | 0.480   |                         |
| Time * group    | 3.5            | 0.170   |                         |

### Estimation of effects based on this model

|                                                      | Coefficient | Wald test |
|------------------------------------------------------|-------------|-----------|
| Group difference in mean change from 0 to 5.5 months | -1.475      | 0.267     |
| Group difference in mean change from 0 to 12 months  | -0.344      | 0.836     |

### Estimation of intragroup and inter-group effect sizes using Cohen's d

#### Intragroup effect sizes

| Group    | Change      | Cohen's d |
|----------|-------------|-----------|
| PathMate | 0 to 5.5 mo | 0.522     |
| Control  | 0 to 5.5 mo | 0.983     |
| PathMate | 0 to 12 mo  | 0.978     |
| Control  | 0 to 12 mo  | 0.963     |

**Intergroup effect sizes calculated as the difference between intragroup effect sizes**

|                |                  |        |
|----------------|------------------|--------|
| PM vs. control | 0 to 5.5 mo (D1) | -0.461 |
| PM vs. control | 0 to 12 mo (D2)  | 0.015  |

**Intergroup effect sizes calculated as Cohen's d for each time point**

|                |                 |        |
|----------------|-----------------|--------|
| PM vs. control | 0 months (T0)   | -0.131 |
| PM vs. control | 5.5 months (T1) | -0.489 |
| PM vs. control | 12 months (T2)  | -0.504 |

**Pushup****Test of effects based on a generalized estimating equations (GEE) model**

| Effect          | X <sup>2</sup> | p-value |                         |
|-----------------|----------------|---------|-------------------------|
| Time            | 46.6           | <0.001  | 0 vs. 5.5 vs. 12 months |
| Treatment group | 1.7            | 0.190   |                         |
| Time * group    | 0.2            | 0.920   |                         |

**Estimation of effects based on this model**

|                                                      | Coefficient | Wald test |
|------------------------------------------------------|-------------|-----------|
| Group difference in mean change from 0 to 5.5 months | 0.165       | 0.852     |
| Group difference in mean change from 0 to 12 months  | -0.089      | 0.932     |

**Estimation of intragroup and inter-group effect sizes using Cohen's d****Intragroup effect sizes**

| Group    | Change      | Cohen's d |
|----------|-------------|-----------|
| PathMate | 0 to 5.5 mo | 0.867     |
| Control  | 0 to 5.5 mo | 1.196     |
| PathMate | 0 to 12 mo  | 1.069     |
| Control  | 0 to 12 mo  | 1.969     |

**Intergroup effect sizes calculated as the difference between intragroup effect sizes**

|                |                  |        |
|----------------|------------------|--------|
| PM vs. control | 0 to 5.5 mo (D1) | -0.329 |
| PM vs. control | 0 to 12 mo (D2)  | -0.9   |

**Intergroup effect sizes calculated as Cohen's d for each time point**

|                |                 |        |
|----------------|-----------------|--------|
| PM vs. control | 0 months (T0)   | -0.444 |
| PM vs. control | 5.5 months (T1) | -0.370 |
| PM vs. control | 12 months (T2)  | -0.522 |

**Reach flexibility****Test of effects based on a generalized estimating equations (GEE) model**

| Effect          | X <sup>2</sup> | p-value |                         |
|-----------------|----------------|---------|-------------------------|
| Time            | 27.2           | <0.001  | 0 vs. 5.5 vs. 12 months |
| Treatment group | 0.2            | 0.630   |                         |
| Time * group    | 8.7            | 0.010   |                         |

**Estimation of effects based on this model**

|                                                      | Coefficient | Wald test |
|------------------------------------------------------|-------------|-----------|
| Group difference in mean change from 0 to 5.5 months | 2.9         | 0.006     |
| Group difference in mean change from 0 to 12 months  | 1.25        | 0.437     |

## Estimation of intragroup and inter-group effect sizes using Cohen's d

### Intragroup effect sizes

| Group    | Change      | Cohen's d |
|----------|-------------|-----------|
| PathMate | 0 to 5.5 mo | 1.261     |
| Control  | 0 to 5.5 mo | 0.608     |
| PathMate | 0 to 12 mo  | 0.542     |
| Control  | 0 to 12 mo  | 0.295     |

### Intergroup effect sizes calculated as the difference between intragroup effect sizes

|                |                  |       |
|----------------|------------------|-------|
| PM vs. control | 0 to 5.5 mo (D1) | 0.653 |
| PM vs. control | 0 to 12 mo (D2)  | 0.247 |

### Intergroup effect sizes calculated as Cohen's d for each time point

|                |                 |        |
|----------------|-----------------|--------|
| PM vs. control | 0 months (T0)   | -0.340 |
| PM vs. control | 5.5 months (T1) | 0.130  |
| PM vs. control | 12 months (T2)  | -0.008 |
